# Supplementary material
Source: PubMed Central journal article supplement (PMC8991396)
Supplement: NIHMS1781239-supplement-2.pdf [file NIHMS1781239-supplement-2.pdf]

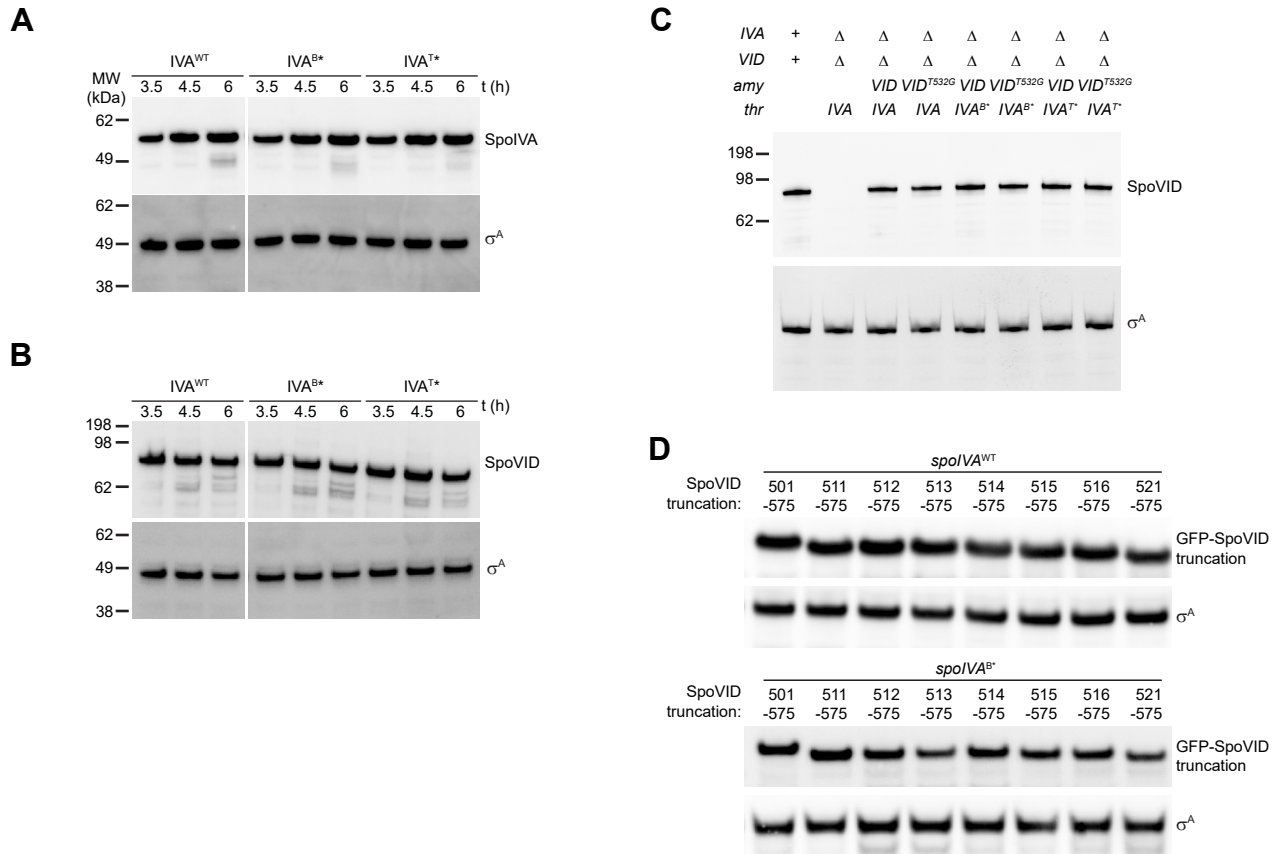

**Figure S1, Related to Figure 1, 3, and 5.** Protein stability during sporulation. (A-B) Immunoblot of cell extracts of sporulating *B. subtilis* using (A) anti-SpoIVA or (B) anti-SpoVID antisera, from cells harvested 3.5 h, 4.5 h and 6 h after the induction of sporulation with strains containing *spoIVA*<sup>WT</sup> or *spoIVA*<sup>B\*</sup> or *spoIVA*<sup>T\*</sup> as indicated. Strains used : KR394, JB103, JPC221. (C) Immunoblot of cell extracts of sporulating *B. subtilis* cells harvested 3.5 h after induction of sporulation using anti-SpoVID antiserum with strains harboring *spoIVA*<sup>WT</sup> or *spoIVA*<sup>B\*</sup> or *spoIVA*<sup>T\*</sup> and *spoVID*<sup>WT</sup> or *spoVID*<sup>T532G</sup> as indicated. Strains used : PY79, JB171, JB174, JB281, JB293, JB295, JB176, JB242. (D) Immunoblot of cell extracts of sporulating *B. subtilis* cells harvested 3.5 h after induction of sporulation using anti-GFP antiserum with strains harboring *spoIVA*<sup>WT</sup> (top) or *spoIVA*<sup>B\*</sup> (bottom) and expressing *gfp-spoVID*<sup>501-575</sup>, *gfp-spoVID*<sup>511-575</sup>, *gfp-spoVID*<sup>512-575</sup>, *gfp-spoVID*<sup>513-575</sup>, *gfp-spoVID*<sup>514-575</sup>, *gfp-spoVID*<sup>515-575</sup>, *gfp-spoVID*<sup>516-575</sup>, or *gfp-spoVID*<sup>521-575</sup>. Strains used: TD931, TD996, TD998, TD999, TD1000, TD1001, TD1002, TD997, TD933, TD961, TD979, TD980, TD981, TD982, TD983, TD962. Immunoblot using anti- $\sigma^A$  (housekeeping transcription factor) antiserum was performed for each set of data as a loading control.

**Table S1, Related to Figure 4: SpoVID intracellular concentration via immunoblot analysis, with previously reported intracellular concentrations of SpoIVA and Lipid II.** Errors, when reported, are S.D.; n=3.

| Molecule | Time after sporulation induction (h), or growth phase | Molecules per sporangium or cell                   | Reference                         |
|----------|-------------------------------------------------------|----------------------------------------------------|-----------------------------------|
| SpoIVA   | 4                                                     | 270,000 ± 90,000                                   | Peluso <i>et al.</i> , 2019       |
| SpoVID   | 5.5                                                   | 650,000 ± 250,000                                  | This study                        |
| Lipid II | Logarithmic growth                                    | 18,000 (15,000 inner leaflet; 3,000 outer leaflet) | Piepenbreier <i>et al.</i> , 2019 |
